# Supplementary material
Source: Springer Nature journal article supplement (https://www.springermedizin.de/resource/supplementary/13058_2011_2948_MOESM7_ESM.pdf/9702898)

**A**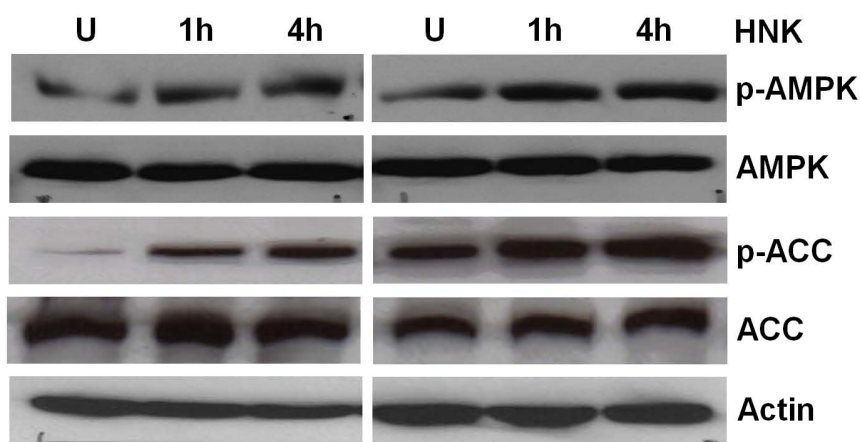**MCF7****MDA-MB-231**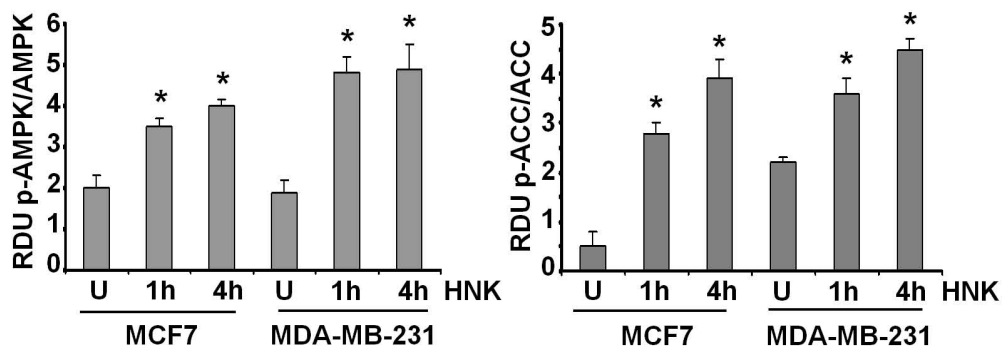**B**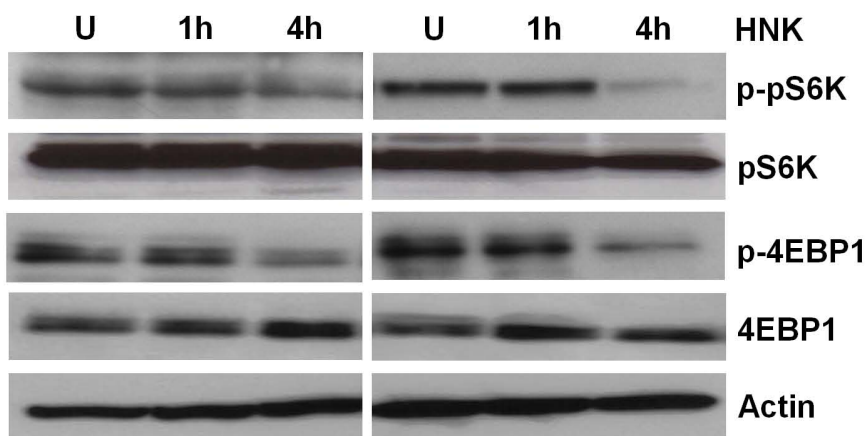**MCF7****MDA-MB-231**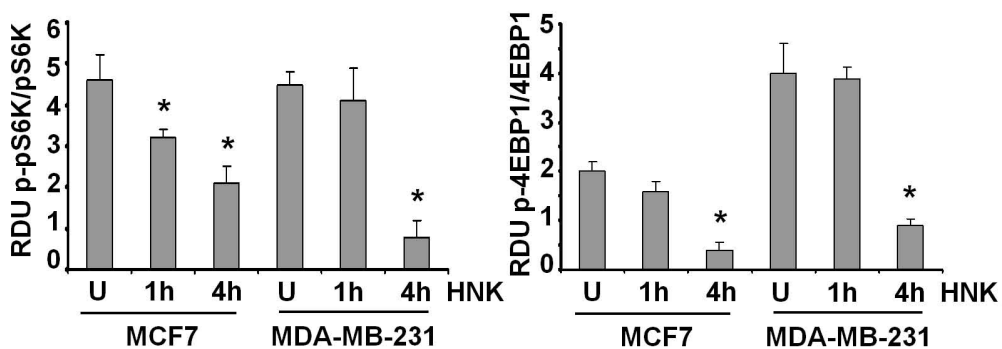

Supplement: MOESM7 [file 9702898]
